# Supplementary material for: Discovery of Phenolic Glycoside from Hyssopus cuspidatus Attenuates LPS-Induced Inflammatory Responses by Inhibition of iNOS and COX-2 Expression through Suppression of NF-κB Activation
Source: MDPI journal article supplement (doi:10.3390/ijms222212128), 2021-11-09
Supplement: s1 [file s1]

Supplementary Materials for

# Discovery of Phenolic Glycoside from *Hyssopus cuspidatus* Attenuates LPS-Induced Inflammatory Responses by Inhibition of iNOS and COX-2 Expression through Suppression of NF- $\kappa$ B Activation

Xingyu Liu<sup>1</sup>, Jie Su<sup>1</sup>, Geng Wang<sup>2</sup>, Lihua Zheng<sup>2</sup>, Guannan Wang<sup>1</sup>, Ying Sun<sup>1</sup>, Yongli Bao<sup>1</sup>, Shuyue Wang<sup>1,\*</sup> and Yanxin Huang<sup>2,\*</sup>

<sup>1</sup> National Engineering Laboratory for Druggable Gene and Protein Screening, Northeast Normal University, Changchun 130117, China; liuxy013@nenu.edu.cn (X.L.); suj445@nenu.edu.cn (J.S.); wanggn258@nenu.edu.cn (G.W.); suny040@nenu.edu.cn (Y.S.); baoyl800@nenu.edu.cn (Y.B.)

<sup>2</sup> NMPA Key Laboratory for Quality Control of Cell and Gene Therapy Medicine Products, Northeast Normal University, Changchun 130117, China; wangg666@nenu.edu.cn (G.W.); zhenglh015@nenu.edu.cn (L.Z.)

\* Correspondence: wangsyl71@nenu.edu.cn (S.W.); huangyx356@nenu.edu.cn (Y.H.); Tel.: +86-431-8916-5922 (S.W. & Y.H.); Fax: +86-431-8916-5917 (S.W. & Y.H.)

| Compound           | COX-2 (kcal/mol) | iNOS (kcal/mol) | NF-κB (kcal/mol) | IκB (kcal/mol) |
|--------------------|------------------|-----------------|------------------|----------------|
| 2'-acetylacteoside | -9.2             | -7.8            | -8.3             | -8.5           |
| Echinacoside       | -8.7             | -7.9            | -10.1            | -8.6           |
| Gastrodin          | -7.6             | -6.7            | -7.1             | -6.4           |
| Isoacteoside       | -9.0             | -9.6            | -8.2             | -9.2           |
| Salidroside        | -7.2             | -8.1            | -6.8             | -6.4           |
| Verbascoside       | -10.2            | -10             | -8.4             | -9.2           |
| Hyssoposide        | -9.5             | -9.0            | -8.6             | -7.7           |

Figure S1: The binding energy profile of molecular docking of natural phenolic glycosides with COX-2, iNOS, NF-κB and IκB.

Figure 5C: p65

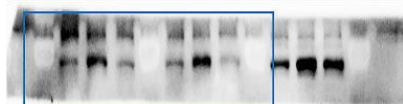

Lane Description:

**p65 in RAW 264.7 cells**

Lane 1: marker for 70 KDa

Lane 2: Control

Lane 3: Treated with LPS for 60 min

Lane 4: Treat with LPS and 35 μM HY for 60 min

**p65 in primary peritoneal macrophages**

Lane 5: marker for 70 KDa

Lane 6: Control

Lane 7: Treated with LPS for 60 min

Lane 8: Treat with LPS and 35 μM HY for 60 min

Lane 9: marker for 70 KDa

Lane 10-12: Not appeared in the manuscript

Figure 5C: Histone-H3

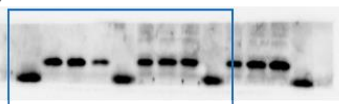

Lane Description:

**Histone-H3 in RAW 264.7 cells**

Lane 1: marker for 15 KDa

Lane 2: Control

Lane 3: Treated with LPS for 60 min

Lane 4: Treat with LPS and 35 μM HY for 60 min

**Histone-H3 in primary peritoneal macrophages**

Lane 5: marker for 15 KDa

Lane 6: Control

Lane 7: Treated with LPS for 60 min

Lane 8: Treat with LPS and 35 μM HY for 60 min

Lane 9: marker for 15 KDa

Lane 10-12: Not appeared in the manuscript

Figure 5C: GAPDH

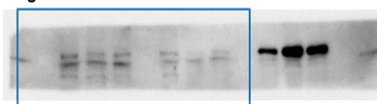

Lane Description:

**GAPDH in RAW 264.7 cells**

Lane 1: marker for 35 KDa

Lane 2: Control

Lane 3: Treated with LPS for 60 min

Lane 4: Treat with LPS and 35 μM HY for 60 min

**GAPDH in primary peritoneal macrophages**

Lane 5: marker for 35 KDa

Lane 6: Control

Lane 7: Treated with LPS for 60 min

Lane 8: Treat with LPS and 35 μM HY for 60 min

Lane 9: marker for 35 KDa

Lane 10-12: Not appeared in the manuscript

Figure S2: The whole un-cropped western blots images of figure 5C and 5D.

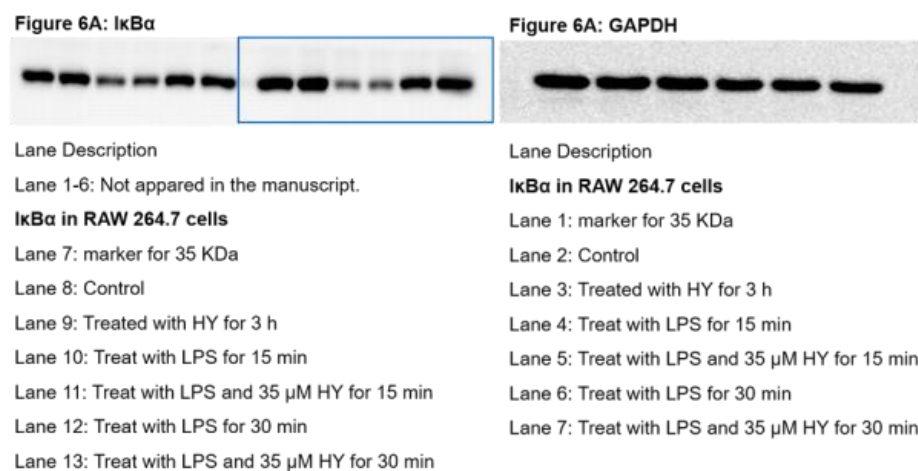

Figure S3: The whole un-cropped western blots images of figure 6A.

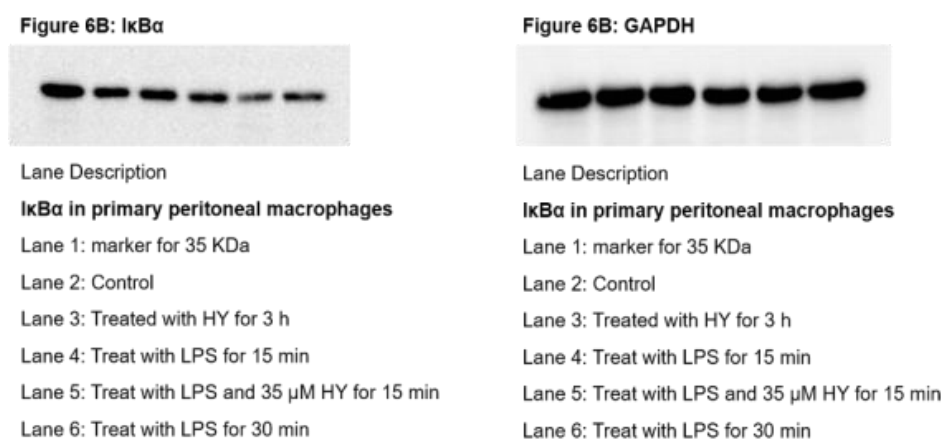

Figure S4: The whole un-cropped western blots images of figure 6B.

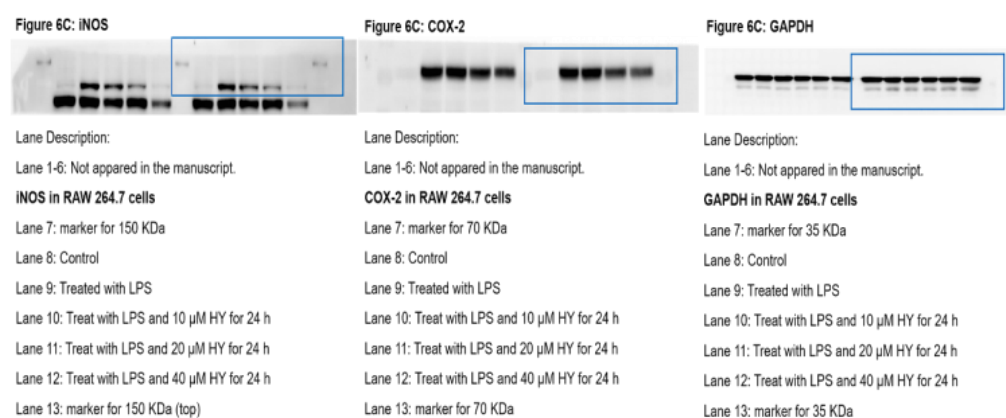

Figure S5: The whole un-cropped western blots images of figure 6C.

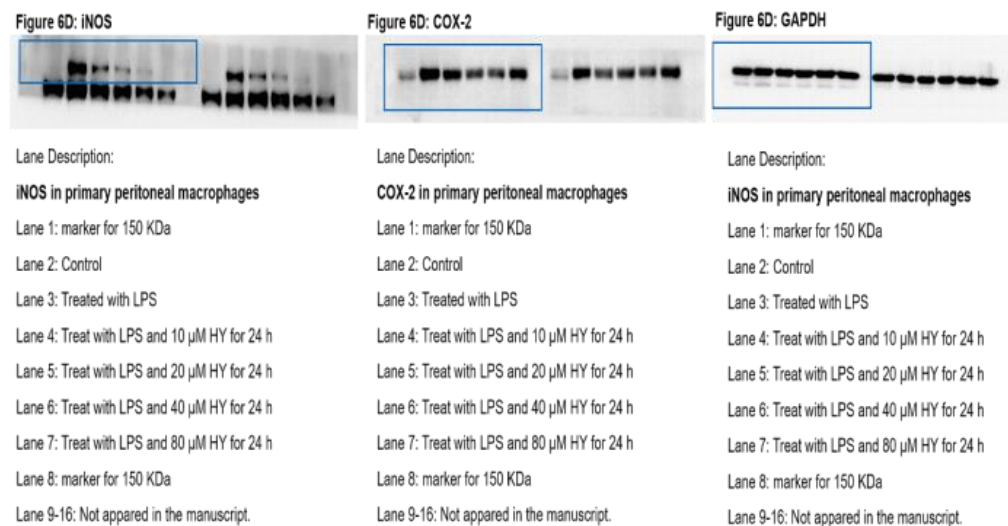

Figure S6: The whole un-cropped western blots images of figure 6D.

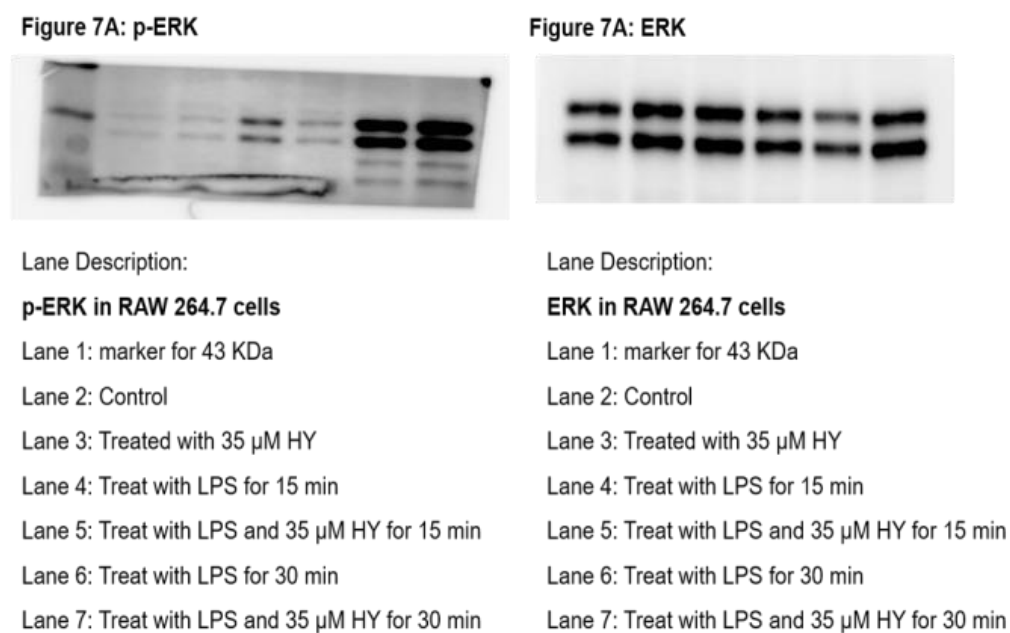

Figure S7: The whole un-cropped western blots images of figure 7A.

**Figure 7A: p-p38**

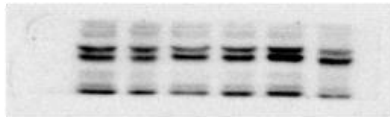

Lane Description:

**p-p38 in RAW 264.7 cells**

Lane 1: marker (too weak )  
Lane 2: Control  
Lane 3: Treated with 35  $\mu$ M HY  
Lane 4: Treat with LPS for 15 min  
Lane 5: Treat with LPS and 35  $\mu$ M HY for 15 min  
Lane 6: Treat with LPS for 30 min  
Lane 7: Treat with LPS and 35  $\mu$ M HY for 30 min

**Figure 7A: p38**

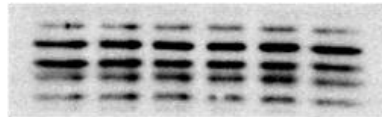

Lane Description:

**p-p38 in RAW 264.7 cells**

Lane 1: Control  
Lane 2: Treated with 35  $\mu$ M HY  
Lane 3: Treat with LPS for 15 min  
Lane 4: Treat with LPS and 35  $\mu$ M HY for 15 min  
Lane 5: Treat with LPS for 30 min  
Lane 6: Treat with LPS and 35  $\mu$ M HY for 30 min

Figure S8: The whole un-cropped western blots images of figure 7A.

**Figure 7A: GAPDH**

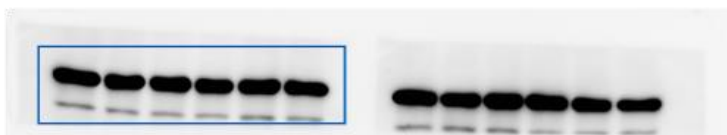

Lane Description:

**GAPDH in RAW 264.7 cells**

Lane 1: marker  
Lane 2: Control  
Lane 3: Treated with 35  $\mu$ M HY  
Lane 4: Treat with LPS for 15 min  
Lane 5: Treat with LPS and 35  $\mu$ M HY for 15 min  
Lane 6: Treat with LPS for 30 min  
Lane 7: Treat with LPS and 35  $\mu$ M HY for 30 min  
Lane 8: marker  
Lane 9-14: Not appeared in the manuscript

Figure S9: The whole un-cropped western blots images of GAPDH for figure 7A.

**Figure 7B: p-ERK**

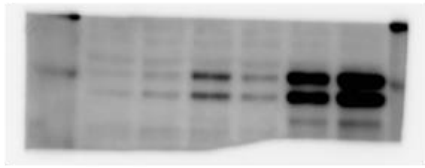

Lane Description:

**p-ERK in primary peritoneal macrophages**

Lane 1: marker for 43 KDa

Lane 2: Control

Lane 3: Treated with 35  $\mu$ M HY

Lane 4: Treat with LPS for 15 min

Lane 5: Treat with LPS and 35  $\mu$ M HY for 15 min

Lane 6: Treat with LPS for 30 min

Lane 7: Treat with LPS and 35  $\mu$ M HY for 30 min

**Figure 7B: ERK**

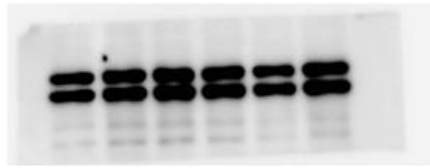

Lane Description:

**ERK in primary peritoneal macrophages**

Lane 1: Control

Lane 2: Treated with 35  $\mu$ M HY

Lane 3: Treat with LPS for 15 min

Lane 4: Treat with LPS and 35  $\mu$ M HY for 15 min

Lane 5: Treat with LPS for 30 min

Lane 6: Treat with LPS and 35  $\mu$ M HY for 30 min

Lane 7: marker (too weak )

Figure S10: The whole un-cropped western blots images of figure 7B.

**Figure 7B: p-p38**

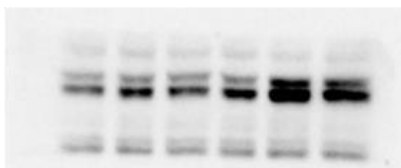

Lane Description:

**p-p38 in primary peritoneal macrophages**

Lane 1: marker (too weak )

Lane 2: Control

Lane 3: Treated with 35  $\mu$ M HY

Lane 4: Treat with LPS for 15 min

Lane 5: Treat with LPS and 35  $\mu$ M HY for 15 min

Lane 6: Treat with LPS for 30 min

Lane 7: Treat with LPS and 35  $\mu$ M HY for 30 min

**Figure 7B: p38**

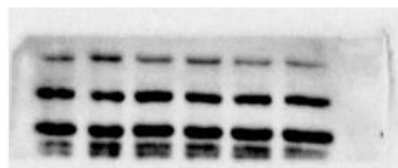

Lane Description:

**p38 in primary peritoneal macrophages**

Lane 1: Control

Lane 2: Treated with 35  $\mu$ M HY

Lane 3: Treat with LPS for 15 min

Lane 4: Treat with LPS and 35  $\mu$ M HY for 15 min

Lane 5: Treat with LPS for 30 min

Lane 6: Treat with LPS and 35  $\mu$ M HY for 30 min

Lane 7: marker (too weak )

Figure S11: The whole un-cropped western blots images of figure 7B.

**Figure 7B: GAPDH**

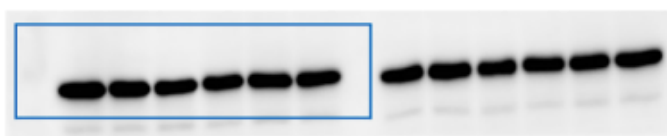

Lane Description:

**GAPDH in primary peritoneal macrophages**

Lane 1: marker for 35 KDa

Lane 2: Control

Lane 3: Treated with 35  $\mu$ M HY

Lane 4: Treat with LPS for 15 min

Lane 5: Treat with LPS and 35  $\mu$ M HY for 15 min

Lane 6: Treat with LPS for 30 min

Lane 7: Treat with LPS and 35  $\mu$ M HY for 30 min

Lane 8: marker for 35 KDa

Lane 9-14: Not appeared in the manuscript

Figure S12: The whole un-cropped western blots images of GAPDH for figure 7B.
